# Supplementary material for: Directional selectivity of afferent neurons in zebrafish neuromasts is regulated by Emx2 in presynaptic hair cells
Source: eLife. 2018 Apr 19;7:e35796. doi: 10.7554/eLife.35796 (PMC5935481; doi:10.7554/eLife.35796)
Supplement: Figure 2—source data 1. [file elife-35796-fig2-data1.xlsx]

## Sheet: Data
	Percentages of tdTomato-positive area per total GFP-positive area
	WT	%
	1	48.3391
	2	45.3743
	3	45.4059
	Average	46.3731
	emx2 ko major	%		emx2 gof major	%
	1	69.0036		1	69.8481
	2	76.3225		2	89.4246
	3	66.1922		3	74.9884
	Average	70.5061		4	72.3246
	p-value by ANOVA	0.00160817		5	72.5561
				6	66.764
				Average	74.3177
				p-value by ANOVA	0.00062547
	emx2 ko minor	%		emx gof minor	%
	1	27.4203		1	12.1598
	2	18.1458		2	21.5182
	3	22.7819		3	23.956
	Average	22.7827		4	22.896
	p-value by ANOVA	0.00116595		Average	20.1325
				p-value by ANOVA	0.000509606
