# Supplementary material for: Directional selectivity of afferent neurons in zebrafish neuromasts is regulated by Emx2 in presynaptic hair cells
Source: eLife. 2018 Apr 19;7:e35796. doi: 10.7554/eLife.35796 (PMC5935481; doi:10.7554/eLife.35796)
Supplement: Figure 4—source data 1. [file elife-35796-fig4-data1.xlsx]

## Sheet: Sheet1
	Quantification of colocalization between RibeyeB and tdTomato-positive nerve endings per HC
	WT
	Sample #	Avg # of co-localized RibeyeB puncta per innervated hair cells
	1	1.875
	2	1.625
	3	1.85714
	4	3
	5	2.8
	6	2.5
	7	2.16667
	8	2.125
	Average	2.2436
	emx2 ko major						emx2 gof major
	1	1.77778					1	2
	2	1.42857					2	3
	3	1.91667					3	1.875
	4	1.14286					4	1.6
	5	2.4					5	1
	6	1.8					6	2.33333
	Average	1.74431					7	2.22222
	p-value by ANOVA	0.0684907					8	2
							Average	2.00382
							p-value by ANOVA	0.383128
	emx2 ko minor						emx2 gof minor
	1	2					1	1.25
	2	0.75					2	1.25
	3	0.666667					3	1.6
	4	1.25					4	0.5
	Average	1.16667					5	0.5
	p-value by ANOVA	0.00739905					6	1.2
							7	2
							Average	1.18571
							p-value by ANOVA	0.00155305
