# Supplementary material for: Directional selectivity of afferent neurons in zebrafish neuromasts is regulated by Emx2 in presynaptic hair cells
Source: eLife. 2018 Apr 19;7:e35796. doi: 10.7554/eLife.35796 (PMC5935481; doi:10.7554/eLife.35796)
Supplement: Figure 4—source data 2. [file elife-35796-fig4-data2.xlsx]

## Sheet: Sheet1
	Mander's coefficient of RibeyeB and tdTomato colocalization
	WT
	sample #	avg ratio of co-localization in total ribeye per HC
	1	0.6436
	2	0.4716
	3	0.72
	4	0.5646
	5	0.7568
	6	0.5624
	7	0.7992
	8	0.834429
	Average	0.645457
	emx2 ko major				emx2 gof major
	1	0.5766			1	0.44275
	2	0.5032			2	0.44075
	3	0.5858			3	0.502
	4	0.5626			4	0.417
	5	0.6716			5	0.3915
	6	0.6044			6	0.68925
	Average	0.57996			7	0.61
	p-value by ANOVA	0.158562			8	0.50325
					Average	0.499036
					p-value by ANOVA	0.0113884
	emx2 ko minor				emx2 gof minor
	1	0.537333			1	0.4475
	2	0.2135			2	0.28
	3	0.486			3	0.314
	4	0.6325			4	0.542
	Average	0.412278			5	0.7
	p-value by ANOVA	0.047781			6	0.688
					7	0.4785
					Average	0.49525
					p-value by ANOVA	0.0370925
