# Supplementary material for: Directional selectivity of afferent neurons in zebrafish neuromasts is regulated by Emx2 in presynaptic hair cells
Source: eLife. 2018 Apr 19;7:e35796. doi: 10.7554/eLife.35796 (PMC5935481; doi:10.7554/eLife.35796)
Supplement: Figure 5—source data 1. [file elife-35796-fig5-data1.xlsx]

## Sheet: Sheet1
	Quantification of colocalized RibeyeB and Maguk puncta per HC
	WT	RibeyeB and Maguk colocalized number/Hair cell
	1	2.94118
	2	3
	3	2.7
	4	3.33333
	5	2.7
	6	2.47368
	7	3.26667
	8	3.23529
	9	3.05
	10	3.25
	11	3.33333
	12	2.93333
	13	2.875
	14	2.83333
	15	2.875
	16	3.35714
	17	2.66667
	18	3.2
	Average	3.00133
	emx2 ko
	1	3.125
	2	3
	3	3.31579
	4	3.4375
	5	3.1875
	6	3.28571
	7	2.84615
	8	3
	9	3.5
	10	3.3
	11	3.66667
	12	2.85714
	13	3.19048
	14	3.45
	15	3.25
	16	3
	17	2.88889
	18	2.5
	Average	3.1556
	p-value by ANOVA	0.103137
	emx2 gof
	1	3.28571
	2	3.21429
	3	2.75
	4	2.5625
	5	2.69231
	6	2.85714
	7	3
	8	2.6
	9	3.07143
	10	2.3125
	11	2.84615
	12	2.42857
	13	3.33333
	14	2.94118
	15	2.5625
	16	3.38889
	17	3.76471
	18	3
	19	3.22222
	20	2.8
	21	3
	22	3.58824
	23	3.41667
	24	2.75
	25	3.25
	Average	2.98553
	p-value by ANOVA	0.877776
