# Supplementary material for: Directional selectivity of afferent neurons in zebrafish neuromasts is regulated by Emx2 in presynaptic hair cells
Source: eLife. 2018 Apr 19;7:e35796. doi: 10.7554/eLife.35796 (PMC5935481; doi:10.7554/eLife.35796)
Supplement: Figure 5—source data 2. [file elife-35796-fig5-data2.xlsx]

## Sheet: Sheet1
	Mander's coefficient of RibeyeB and Maguk colocalization.
	WT	Fraction of maguk overlapping with ribeyeB	Fraction of RibeyeB overlapping with Maguk
	1	0.452	0.173
	2	0.332	0.085
	3	0.579	0.253
	4	0.564	0.211
	5	0.491	0.19
	6	0.468	0.143
	7	0.48	0.167
	8	0.324	0.214
	9	0.46	0.194
	10	0.617	0.276
	11	0.446	0.41
	12	0.6	0.489
	13	0.67	0.295
	14	0.461	0.203
	15	0.564	0.298
	16	0.631	0.324
	17	0.65	0.381
	18	0.632	0.35
	Average	0.523389	0.258667
	emx2 ko	Fraction of maguk overlapping with ribeyeB	Fraction of RibeyeB overlapping with Maguk
	1	0.687	0.221
	2	0.563	0.116
	3	0.658	0.189
	4	0.623	0.138
	5	0.399	0.514
	6	0.403	0.384
	7	0.472	0.379
	8	0.507	0.183
	9	0.443	0.541
	10	0.61	0.411
	11	0.532	0.313
	12	0.488	0.398
	13	0.596	0.207
	14	0.396	0.346
	15	0.506	0.236
	16	0.635	0.478
	17	0.527	0.327
	18	0.447	0.24
	Average	0.527333	0.312278
	p-value by ANOVA	0.907078	0.196467
	emx2 gof	Fraction of maguk overlapping with ribeyeB	Fraction of RibeyeB overlapping with Maguk
	1	0.513	0.247
	2	0.612	0.083
	3	0.465	0.188
	4	0.693	0.205
	5	0.584	0.139
	6	0.783	0.138
	7	0.632	0.183
	8	0.529	0.293
	9	0.56	0.404
	10	0.287	0.214
	11	0.585	0.396
	12	0.545	0.278
	13	0.621	0.275
	14	0.569	0.312
	15	0.65	0.323
	16	0.624	0.436
	17	0.43	0.268
	18	0.621	0.328
	19	0.511	0.284
	20	0.511	0.343
	21	0.613	0.31
	22	0.618	0.344
	23	0.522	0.184
	24	0.621	0.428
	25	0.518	0.349
	Average	0.56868	0.27808
	p-value by ANOVA	0.145332	0.525072
