# Supplementary material for: Directional selectivity of afferent neurons in zebrafish neuromasts is regulated by Emx2 in presynaptic hair cells
Source: eLife. 2018 Apr 19;7:e35796. doi: 10.7554/eLife.35796 (PMC5935481; doi:10.7554/eLife.35796)
Supplement: Figure 5—source data 3. [file elife-35796-fig5-data3.xlsx]

## Sheet: Sheet1
	Quantification of total number of RibeyeB and Maguk puncta per HC
	WT	# of RibeyeB/HC	# of Maguk/HC
	1	3.05882	3
	2	3.2	3.05
	3	2.8	2.75
	4	3.46667	3.46667
	5	2.8	2.75
	6	2.63158	2.47368
	7	3.33333	3.53333
	8	3.23529	3.23529
	9	3.05	3.05
	10	3.5	3.5
	11	3.33333	3.5
	12	3	3.2
	13	2.875	2.9375
	14	2.94444	2.83333
	15	3.125	3.125
	16	3.35714	3.5
	17	2.66667	2.83333
	18	3.33333	3.2
	Average	3.09503	3.10767
	emx2 ko	# of RibeyeB/HC	# of Maguk/HC
	1	3.375	3.5625
	2	3.5625	3.375
	3	3.94737	3.57895
	4	3.6875	3.875
	5	3.75	3.5625
	6	4.14286	3.57143
	7	3.15385	3.15385
	8	3.63158	3.26316
	9	3.65	4.15
	10	3.75	3.6
	11	4	4.33333
	12	3	3.28571
	13	3.47619	3.47619
	14	3.85	3.75
	15	3.4	3.55
	16	3.33333	3.66667
	17	3.44444	3.33333
	18	2.9	2.8
	Average	3.55859	3.54931
	p-value by ANOVA	6.09204e-05	0.000335063
	emx2 gof	# of RibeyeB/HC	# of Maguk/HC
	1	3.64286	3.42857
	2	4.14286	3.5
	3	3.375	3
	4	3.625	2.875
	5	3.07692	2.69231
	6	3.42857	3
	7	4	3
	8	3.1	2.6
	9	3.92857	3.42857
	10	3.375	2.625
	11	3.23077	2.84615
	12	3	2.57143
	13	3.66667	3.33333
	14	3.11765	3
	15	3	2.875
	16	3.94444	3.55556
	17	4.35294	3.76471
	18	3.15789	3.05263
	19	3.55556	3.55556
	20	3.13333	2.8
	21	3.25	3.25
	22	4.17647	3.58824
	23	3.75	3.83333
	24	3.625	3.375
	25	3.75	3.75
	Average	3.53622	3.17202
	p-value by ANOVA	0.0002087	0.567072
