# Supplementary material for: Directional selectivity of afferent neurons in zebrafish neuromasts is regulated by Emx2 in presynaptic hair cells
Source: eLife. 2018 Apr 19;7:e35796. doi: 10.7554/eLife.35796 (PMC5935481; doi:10.7554/eLife.35796)
Supplement: Figure 5—source data 4. [file elife-35796-fig5-data4.xlsx]

## Sheet: Sheet1
	Percentages of solitary RibeyeB and Maguk puncta per neuromast
	WT	% of solitary RibeyeB	% of solitary Maguk
	1	3.84615	1.96078
	2	6.25	1.63934
	3	3.57143	1.81818
	4	3.84615	3.84615
	5	3.57143	1.81818
	6	6	0
	7	2	7.54717
	8	0	0
	9	0	0
	10	7.14286	7.14286
	11	0	4.7619
	12	2.22222	8.33333
	13	0	2.12766
	14	3.77358	0
	15	8	8
	16	0	4.08163
	17	0	5.88235
	18	4	0
	Average	3.01243	3.27553
	emx2 ko
	1	7.40741	12.2807
	2	15.7895	11.1111
	3	16	7.35294
	4	6.77966	11.2903
	5	15	10.5263
	6	20.6897	8
	7	9.7561	9.7561
	8	17.3913	8.06452
	9	4.10959	15.6627
	10	12	8.33333
	11	8.33333	15.3846
	12	4.7619	13.0435
	13	8.21918	8.21918
	14	10.3896	8
	15	4.41176	8.4507
	16	10	18.1818
	17	16.129	13.3333
	18	13.7931	10.7143
	Average	11.1645	10.9836
	p-value by ANOVA	5.04543e-07	9.98494e-09
	emx2 gof
	1	9.80392	4.16667
	2	20.6897	10.2041
	3	18.5185	8.33333
	4	29.3103	10.8696
	5	12.5	0
	6	16.6667	4.7619
	7	25	0
	8	16.129	0
	9	21.8182	10.4167
	10	31.4815	11.9048
	11	11.9048	0
	12	19.0476	5.55556
	13	9.09091	0
	14	5.66038	1.96078
	15	14.5833	10.8696
	16	14.0845	4.6875
	17	13.5135	8.33333
	18	5	5.72414
	19	9.375	9.375
	20	10.6383	0
	21	7.69231	7.69231
	22	14.0845	0
	23	8.88889	10.8696
	24	24.1379	18.5185
	25	13.3333	13.3333
	Average	15.3181	6.30306
	p-value by ANOVA	1.35322e-08	0.0328688
