# Supplementary material for: Directional selectivity of afferent neurons in zebrafish neuromasts is regulated by Emx2 in presynaptic hair cells
Source: eLife. 2018 Apr 19;7:e35796. doi: 10.7554/eLife.35796 (PMC5935481; doi:10.7554/eLife.35796)
Supplement: Figure 6—source data 1. [file elife-35796-fig6-data1.xlsx]

## Sheet: Data
	Magnitude of afferent calcium signals per Neuromast (Anterior stimulus)
	WT
	1	26.9748
	2	19.2907
	3	17.0733
	4	21.9912
	5	4.9548
	6	9.8303
	7	53.737
	8	53.1904
	9	5.5728
	10	11.2295
	11	42.4143
	12	21.7688
	13	24.2591
	Average	24.02
	emx2 ko
	1	77.5408
	2	93.0265
	3	33.1626
	4	59.9412
	5	60.4712
	6	20.9276
	7	62.4183
	8	51.318
	Average	57.35
	emx2 gof
	1	3.0387
	2	0
	3	0
	4	0
	5	0
	6	0
	7	0
	Average	0.4341
	Magnitude of afferent calcium signals per Neuromast (Posterior stimulus)
	WT
	1	48.1504
	2	13.902
	3	17.2577
	4	16.0742
	5	14.2816
	6	12.2388
	7	11.8242
	8	7.4933
	9	24.7233
	10	48.941
	11	10.5239
	12	5.8788
	13	23.7201
	Average	24.02
	emx2 ko
	1	0
	2	0
	3	0
	4	0
	5	3.0385
	6	0
	7	2.8403
	8	1.988
	Average	0.9834
	emx2 gof
	1	29.2719
	2	13.3951
	3	28.9103
	4	25.6443
	5	61.4399
	6	39.9663
	7	32.1948
	Average	32.97
