# Supplementary material for: Directional selectivity of afferent neurons in zebrafish neuromasts is regulated by Emx2 in presynaptic hair cells
Source: eLife. 2018 Apr 19;7:e35796. doi: 10.7554/eLife.35796 (PMC5935481; doi:10.7554/eLife.35796)
Supplement: Figure 6—source data 2. [file elife-35796-fig6-data2.xlsx]

## Sheet: Data
	Magnitude of afferent calcium signals per HC (Anterior stimulus)
	WT
	1	132.739
	2	29.3622
	3	51.745
	4	60.9511
	5	18.1877
	6	12.7993
	7	59.9526
	8	47.2218
	9	10.2063
	10	14.6955
	11	52.7298
	12	14.2723
	13	26.8701
	14	59.3101
	15	139.404
	16	31.9683
	17	105.314
	18	50.0274
	19	41.6109
	20	105.906
	21	174.327
	22	124.163
	23	51.8191
	24	203.595
	25	55.8617
	26	101.617
	27	63.7515
	28	81.9197
	29	42.2516
	30	57.37
	31	70.9742
	32	72.9888
	33	154.751
	34	132.783
	35	78.6666
	36	29.7538
	37	28.8909
	38	89.303
	Average	70.53
	emx2 ko
	1	54.0205
	2	153.104
	3	136.218
	4	111.653
	5	40.5309
	6	26.2445
	7	58.7698
	8	46.8554
	9	107.403
	10	28.6716
	11	37.21
	12	79.5239
	13	60.1996
	14	29.5893
	15	122.032
	16	36.5749
	17	76.5278
	18	131.511
	19	118.826
	20	65.0544
	21	54.878
	22	53.729
	23	67.6298
	24	92.7738
	25	75.2584
	26	48.9057
	27	139.638
	28	34.0413
	29	51.3606
	30	113.127
	31	65.4647
	32	103.131
	33	83.1086
	34	31.3041
	35	35.9659
	36	33.4552
	37	29.5092
	38	33.5811
	39	31.5678
	40	57.6201
	41	56.1407
	42	72.983
	43	84.0648
	44	178.375
	Average	71.55
	emx2 gof
	1	0
	2	0
	3	0
	4	0
	5	0
	6	7.1246
	7	0
	8	0
	9	0
	10	0
	11	0
	12	0
	13	0
	14	0
	15	0
	16	0
	17	4.2387
	18	13.2961
	19	0
	20	0
	21	0
	22	0
	23	7.8485
	Average	1.413
	Magnitude of afferent calcium signals per HC (Posterior stimulus)
	WT
	1	67.9988
	2	25.1459
	3	88.8153
	4	25.9881
	5	24.1967
	6	20.8901
	7	23.1494
	8	17.0766
	9	15.4386
	10	41.5524
	11	73.0057
	12	37.0743
	13	68.6953
	14	67.9195
	15	34.5498
	16	35.5527
	17	89.6447
	18	25.2687
	19	27.623
	20	36.4723
	21	186.925
	22	35.953
	23	79.2753
	24	37.932
	25	31.2773
	26	17.8686
	27	22.3307
	28	63.7851
	29	66.6632
	30	50.9427
	31	58.2522
	32	110.391
	33	104.746
	34	46.404
	35	43.8814
	36	73.3975
	37	41.2929
	38	42.0878
	Average	51.56
	emx2 ko
	1	2.9239
	2	1.9509
	3	6.0348
	4	7.7887
	5	8.3463
	6	5.2857
	7	0
	8	0
	9	0
	10	0
	11	0
	12	0
	13	0
	14	0
	15	0
	16	0
	17	0
	18	0
	19	0
	20	0
	21	0
	22	0
	23	0
	24	0
	25	0
	26	0
	27	0
	28	0
	29	0
	30	0
	31	0
	32	0
	33	0
	34	0
	35	0
	Average	0.9237
	emx2 gof
	1	20.5721
	2	113.859
	3	184.644
	4	21.8693
	5	19.6321
	6	21.7416
	7	25.8793
	8	51.4182
	9	65.0721
	10	159.815
	11	98.3314
	12	30.0076
	13	42.8431
	14	161.456
	15	41.7782
	16	77.8306
	17	61.8273
	18	84.1395
	19	46.7781
	20	139.772
	21	45.3214
	22	22.8829
	23	86.3263
	24	111.699
	25	40.6452
	26	53.6473
	27	123.334
	28	101.795
	Average	73.39
