# Supplementary material for: Directional selectivity of afferent neurons in zebrafish neuromasts is regulated by Emx2 in presynaptic hair cells
Source: eLife. 2018 Apr 19;7:e35796. doi: 10.7554/eLife.35796 (PMC5935481; doi:10.7554/eLife.35796)
Supplement: Figure 7—source data 1. [file elife-35796-fig7-data1.xlsx]

## Sheet: Data
	Average spikes per 10, 500ms step stimuli (ON direction)
	WT			emx2 ko			emx2 gof
	1	7.7		1	8.6		1	8.6
	2	14.8		2	25		2	3.9
	3	7.5		3	1		3	4.4
	4	1.3		4	13.9		4	1.9
	5	4.6		5	12.9		5	1.7
	6	8		6	1.2		6	3.7
	7	7.1		7	10.6		7	23.3
	8	21.4		8	9.6		Average	6.786
	9	1		Average	10.35
	10	7.7
	11	16.7
	12	2.4
	13	1.2
	14	8.4
	15	7.9
	Average	7.847
	Average spikes per 10, 500ms step stimuli (OFF direction)
	WT			emx2 ko			emx2 gof
	1	0		1	1.1		1	0.6
	2	1.8		2	0		2	0.2
	3	2.2		3	0		3	0.9
	4	0.1		4	0.3		4	0
	5	0		5	0.1		5	0.2
	6	0		6	0.6		6	0
	7	2.5		7	0.1		7	0.4
	8	0.2		8	0.7		Average	0.3286
	9	1		Average	0.3625
	10	0.8
	11	0.1
	12	0.4
	13	0
	14	0.7
	15	0.6
	Average	0.6933
			Total sample number	Average
			35	0.9237
			Total sample number	Average
			28	73.39
