# Supplementary material for: Directional selectivity of afferent neurons in zebrafish neuromasts is regulated by Emx2 in presynaptic hair cells
Source: eLife. 2018 Apr 19;7:e35796. doi: 10.7554/eLife.35796 (PMC5935481; doi:10.7554/eLife.35796)
Supplement: Figure 8—source data 1. [file elife-35796-fig8-data1.xlsx]

## Sheet: Data
	Ratio of Emx2-positive HCs within a neuromast
	WT	Total HC	Emx2 positive hair cells	Ratio
	1	11	5	0.454545
	2	8	4	0.5
	3	9	5	0.555556
	4	12	6	0.5
	5	14	7	0.5
	6	12	6	0.5
	7	11	6	0.545455
	8	10	5	0.5
	9	13	6	0.461538
	10	14	7	0.5
			Average	0.501709
	Vangl2m209	Total HC	Emx2 positive hair cells	Ratio
	1	9	4	0.444444
	2	11	6	0.545455
	3	11	5	0.454545
	4	14	7	0.5
	5	15	8	0.533333
	6	12	6	0.5
	7	18	9	0.5
	8	14	7	0.5
	9	12	6	0.5
	10	14	7	0.5
	11	17	8	0.470588
	12	14	7	0.5
	13	12	6	0.5
	14	8	4	0.5
	15	12	6	0.5
	16	11	5	0.454545
	17	15	8	0.533333
	18	13	7	0.538462
	19	8	4	0.5
	20	16	8	0.5
	21	14	7	0.5
	22	11	5	0.454545
			Average	0.496784
			p-value by t-test	0.671858
