# Supplementary material for: Directional selectivity of afferent neurons in zebrafish neuromasts is regulated by Emx2 in presynaptic hair cells
Source: eLife. 2018 Apr 19;7:e35796. doi: 10.7554/eLife.35796 (PMC5935481; doi:10.7554/eLife.35796)
Supplement: Figure 8—source data 2. [file elife-35796-fig8-data2.xlsx]

## Sheet: Sheet1
		Ratio of innervated HCs to total number of HCs
		WT	Total HC	Innervated hair cell #	Ratio
		1	14	6	0.428571
		2	10	5	0.5
		3	17	9	0.529412
		4	9	5	0.555556
		5	17	8	0.470588
		6	16	8	0.5
		7	16	8	0.5
		8	14	7	0.5
		9	16	8	0.5
		10	11	6	0.545455
		11	17	8	0.470588
				Average	0.500015
		Vangl2m209	Total HC	Innervated hair cell #	Ratio
		1	12	6	0.5
		2	6	3	0.5
		3	7	3	0.428571
		4	6	3	0.5
		5	9	4	0.444444
		6	6	3	0.5
		7	6	3	0.5
		8	6	3	0.5
		9	4	2	0.5
		10	12	6	0.5
		11	6	3	0.5
		12	12	5	0.416667
		13	4	2	0.5
				Average	0.483822
				p-value (VS WT) by t-test	0.256287
