# Supplementary material for: Directional selectivity of afferent neurons in zebrafish neuromasts is regulated by Emx2 in presynaptic hair cells
Source: eLife. 2018 Apr 19;7:e35796. doi: 10.7554/eLife.35796 (PMC5935481; doi:10.7554/eLife.35796)
Supplement: Table 1—source data 1. [file elife-35796-table1-data1.xlsx]

## Sheet: Sheet1
Source data for Table 1
	WT
	1	57.1429
	2	50
	3	52.9412
	4	55.5556
	5	52.9412
	6	50
	7	50
	8	50
	9	50
	10	54.5455
	11	52.9412
	12	53.3333
	13	53.3333
	14	54.5455
	15	54.5455
	16	55.5556
	17	55.5556
	18	50
	19	53.8462
	20	52.9412
	21	53.3333
	22	50
	Average	52.8662
	emx2 ko major
	1	66.6667
	2	66.6667
	3	71.4286
	4	75
	5	78.5714
	6	80
	7	83.3333
	8	80
	9	75
	10	80
	11	72.2222
	12	70
	13	71.4286
	14	76.9231
	15	73.6842
	16	80
	17	70
	Average	74.7603
	p-value by ANOVA	5.19457e-20
	emx2 ko minor
	1	18.75
	2	20
	3	23.8095
	4	26.087
	5	30.7692
	6	23.0769
	7	27.7778
	8	27.7778
	9	33.3333
	10	23.0769
	11	25
	Average	25.4053
	p-value by ANOVA	1.40668e-21
	emx2 gof major
	1	77.7778
	2	72.2222
	3	75
	4	75
	5	66.6667
	6	70
	7	66.6667
	8	75
	9	72.7273
	10	81.8182
	11	75
	12	75
	13	76.4706
	14	75
	15	70
	16	81.8182
	17	75
	18	75
	19	75
	20	78.5714
	21	83.3333
	22	72.7273
	23	71.4286
	24	81.8182
	25	81.8182
	26	75
	Average	75.2256
	p-value by ANOVA	1.82245e-25
	emx2 gof minor
	1	12.5
	2	28.5714
	3	22.2222
	4	25
	5	13.3333
	6	16.6667
	7	29.4118
	8	27.7778
	9	33.3333
	10	25
	11	28.5714
	12	36.3636
	13	30
	14	27.2727
	15	21.4286
	16	38.4615
	17	22.2222
	Average	25.7727
	p-value by ANOVA	1.07856e-18
